# Supplementary material
Source: publisher figshare collection journal article supplement (https://acs.figshare.com/ndownloader/files/14189105)
Supplement: Supplementary file 1 [file 14189105]

## Supporting Information

### **Graphene Nanoparticles-Based Self-Healing Hydrogel in Preventing Post-Operative Recurrence of Breast Cancer**

Qiwen Li<sup>†§</sup>, Junru Wen<sup>†§</sup>, Chenlu Liu<sup>†</sup>, Yanpeng Jia<sup>‡</sup>, Yongzhi Wu<sup>†</sup>,  
Yue Shan<sup>†</sup>, Zhiyong Qian<sup>‡</sup>, Jinfeng Liao<sup>\*,†</sup>

<sup>†</sup>State Key Laboratory of Oral Diseases, National Clinical Research Centre for Oral Diseases, West China Hospital of Stomatology, Sichuan University, Chengdu, 610041, China.

<sup>‡</sup>State Key Laboratory of Biotherapy/Collaborative Innovation Centre for Biotherapy, West China Hospital, West China Medical School, Sichuan University, Chengdu 610041, China.

<sup>§</sup>Qiwen Li and Junru Wen contributed equally to this work.

\*Corresponding author:

Dr. Jinfeng Liao, State Key Laboratory of Oral Diseases, National Clinical Research Centre for Oral Diseases, West China Hospital of Stomatology, Sichuan University, Chengdu, 610041, China. E-mail: liaojinfeng.762@163.com

**Table S1**

|         | Volume ( $\mu\text{L}$ ) | Concentration (wt%) |    |     |    |     |
|---------|--------------------------|---------------------|----|-----|----|-----|
| CSMA    | 300                      | 30                  |    |     |    |     |
| BPEI    | 150                      | 10                  | 20 | 30  | 40 | 60  |
| BPEI-GO | 50                       | 0.2                 |    | 0.4 |    | 0.6 |

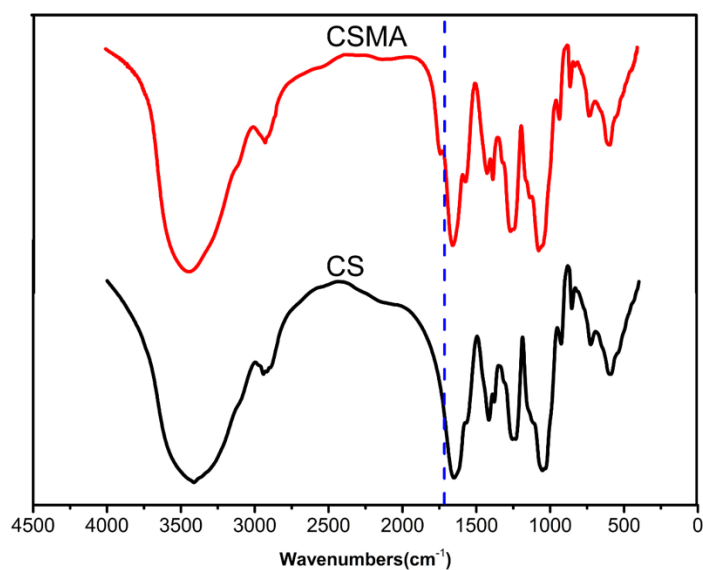

**Figure S1** FT-IR spectra of CS and CSMA. Some characteristic peaks appeared both in CS and CSMA, such as  $\sim 1630\text{ cm}^{-1}$  for amide group,  $\sim 1260\text{ cm}^{-1}$  for S=O bond, etc. Specially, a new peak at  $\sim 1745\text{ cm}^{-1}$  appeared in spectrum of CSMA, demonstrating the aldehyde symmetric vibration.

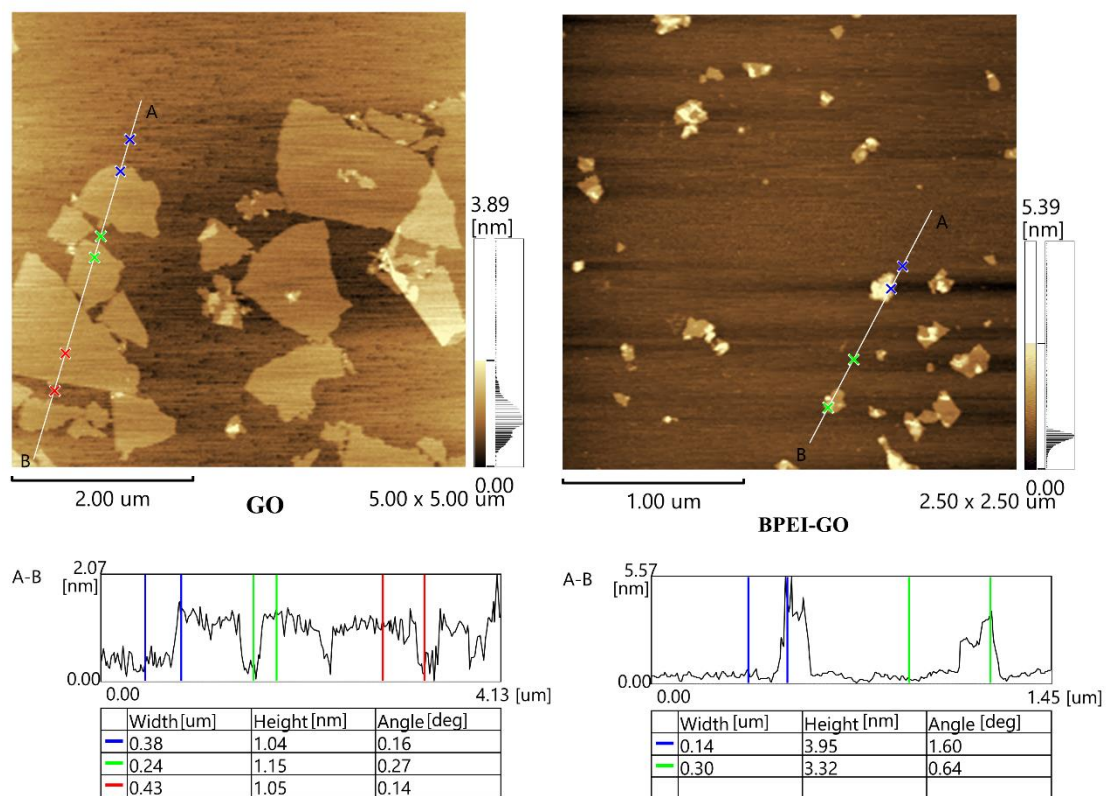

**Figure S2**, thickness of two-dimensional GO and BPEI-GO characterized by AFM.

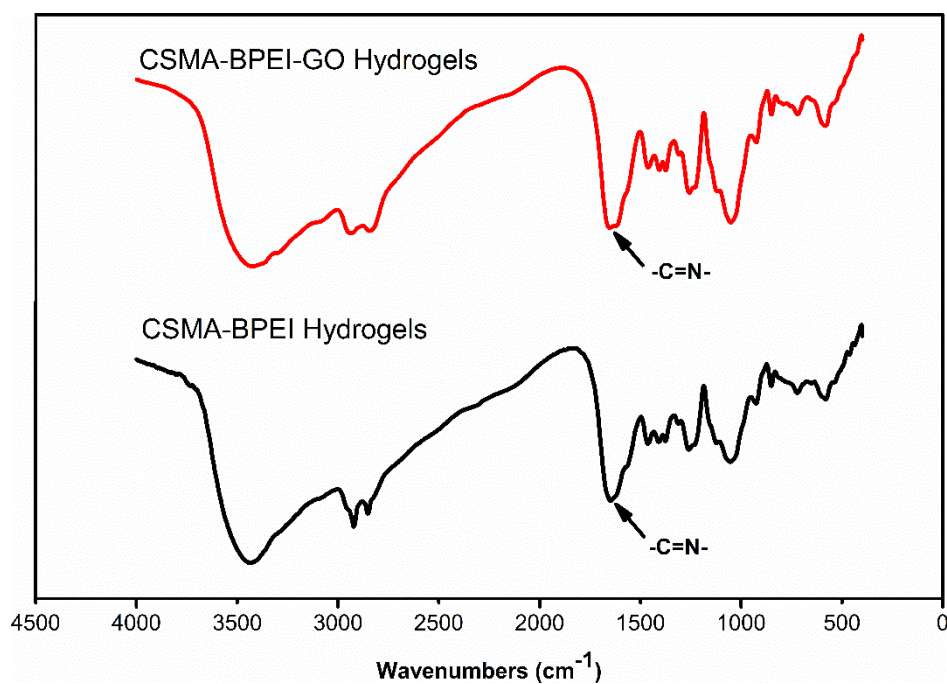

**Figure S3** FT-IR spectra of CSMA/BPEI hydrogel and CSMA/BPEI/BPEI-GO hydrogel.

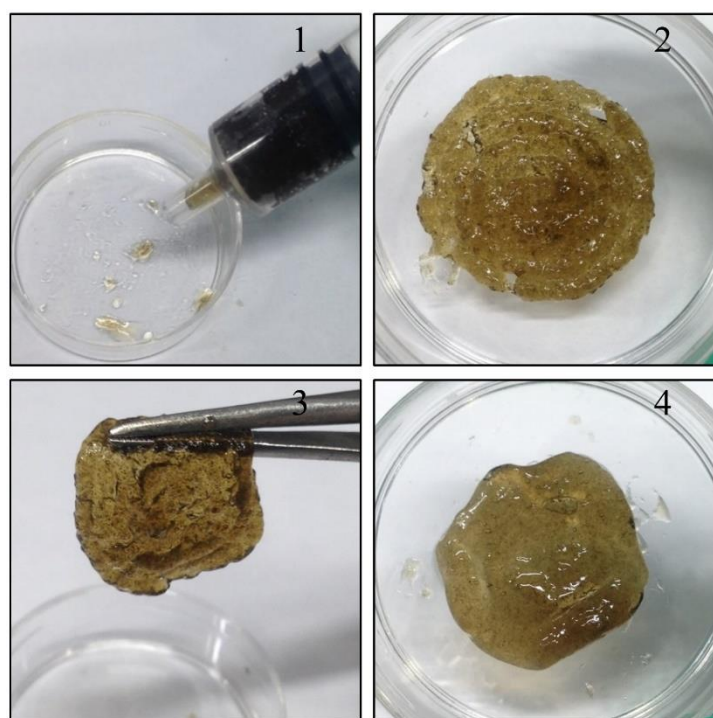

**Figure S4**, Self-healing test of CSMA/BPEI/BPEI-GO hydrogels.

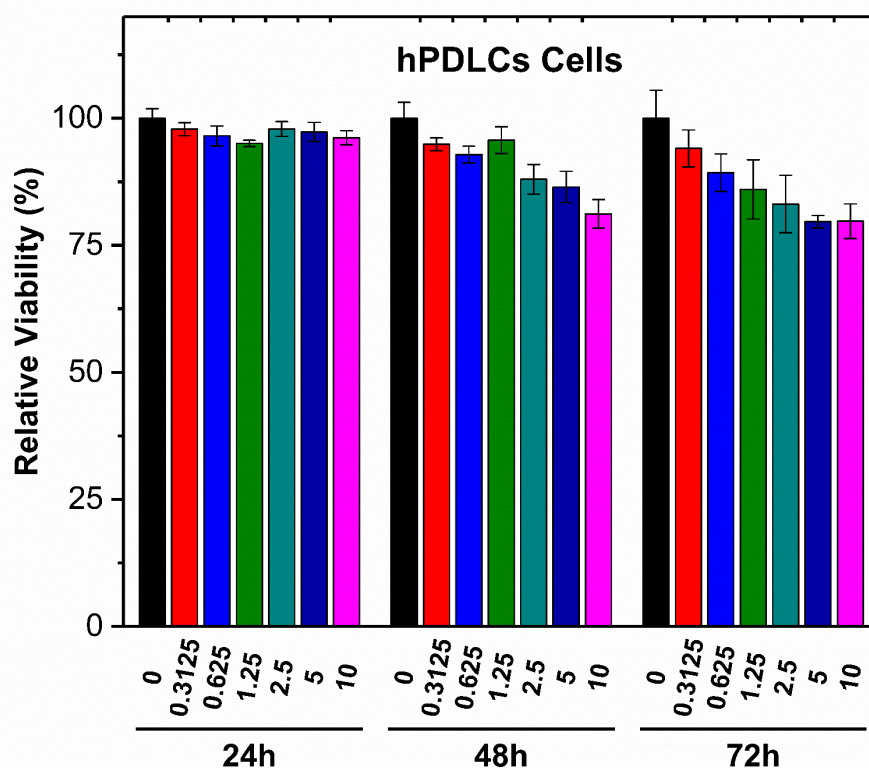

**Figure S5** Cytotoxicity of CSMA/BPEI/BPEI-GO hydrogel leachates at different concentrations (mg/mL) on hPDLCs cells.
